# Supplementary material for: Protein-centric omics integration analysis identifies candidate plasma proteins for multiple autoimmune diseases
Source: Springer Nature journal article supplement (doi:10.1007/s00439-023-02627-0), 2023-12-24

## Supplementary File 2:

### Protein-centric omics integration analysis identifies candidate plasma proteins for multiple autoimmune diseases

Yingxuan Chen<sup>1,2†</sup>, Shuai Liu<sup>1,2†</sup>, Weiming Gong<sup>1,2</sup>, Ping Guo<sup>1,2</sup>, Fuzhong Xue<sup>1,2</sup>, Xiang Zhou<sup>3,4</sup>, Shukang Wang<sup>1,2\*</sup>, Zhongshang Yuan<sup>1,2\*</sup>

<sup>1</sup> Department of Biostatistics, School of Public Health, Cheeloo College of Medicine, Shandong University, 44, Wenhua West Road, Jinan, Shandong, 250012, China.

<sup>2</sup> Institute for Medical Dataology, Shandong University, 12550, Erhuan East Road, Jinan, Shandong, 250003, China.

<sup>3</sup> Department of Biostatistics, University of Michigan, Ann Arbor, MI 48109, USA.

<sup>4</sup> Center for Statistical Genetics, University of Michigan, Ann Arbor, MI 48109, USA.

† Y.C. and S.L. contributed equally to this work.

\* Joint correspondence authors to:

Prof Shukang Wang

Department of Biostatistics, School of Public Health, Cheeloo College of Medicine, Shandong University, 44, Wenhua West Road, Jinan, Shandong, 250012, China.

Email: [wsk2001@sdu.edu.cn](mailto:wsk2001@sdu.edu.cn)

Prof Zhongshang Yuan

Department of Biostatistics, School of Public Health, Cheeloo College of Medicine, Shandong University, 44, Wenhua West Road, Jinan, Shandong, 250012, China.

Email: [yuanzhongshang@sdu.edu.cn](mailto:yuanzhongshang@sdu.edu.cn)

**Figure S1: The PPI network for PWAS significant proteins**

The Network type is full STRING network ( the edges indicate both functional and physical protein associations ). The meaning of network edges is evidence ( line color indicates the type of interaction evidence ). The minimum required interaction score is medium confidence (0.400).

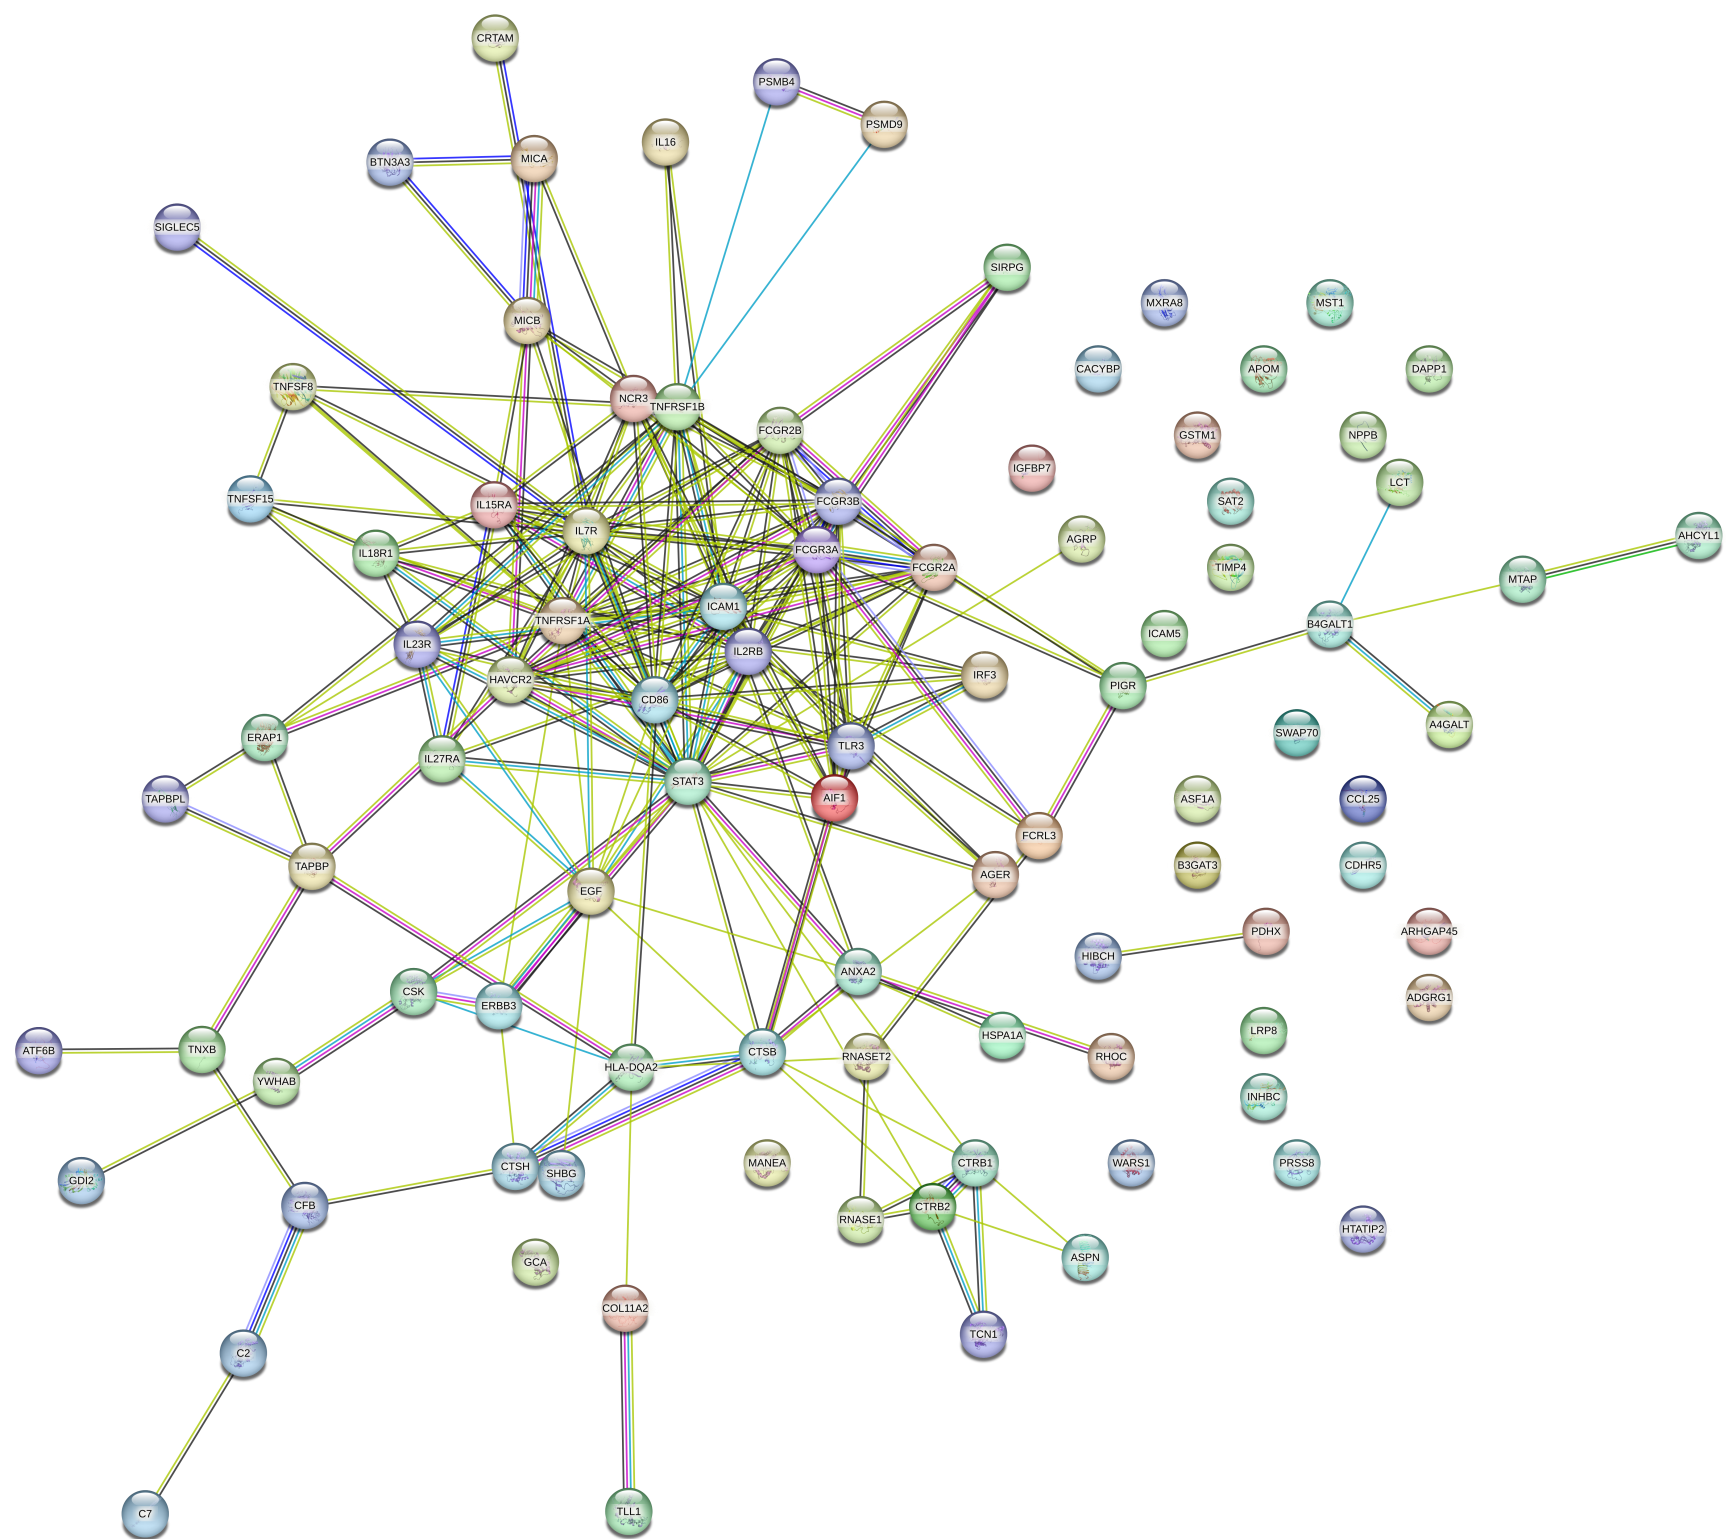

Supplement: MOESM2 [file 439_2023_2627_MOESM2_ESM.pdf]
